# Supplementary material for: Natural variation in stochastic photoreceptor specification and color preference in Drosophila
Source: eLife journal article supplement (doi:10.7554/elife.29593), 2017-12-18
Supplement: supp [file elife-29593-supp-v1.zip]

Archive with 9 entries (9 files):
- elife_poa_e29593_Figure_3_figure_supplement_1.pdf
- elife_poa_e29593_Figure_2_source_data_1.xlsx
- elife_poa_e29593_Figure_1_figure_supplement_3.pdf
- elife_poa_e29593_Figure_1_figure_supplement_4.pdf
- elife_poa_e29593_Transparent_Reporting_File.pdf
- elife_poa_e29593_Figure_1_source_data_1.xlsx
- elife_poa_e29593_Figure_1_figure_supplement_2.pdf
- elife_poa_e29593_Figure_4_figure_supplement_1.pdf
- elife_poa_e29593_Figure_1_figure_supplement_1.pdf
