# Supplementary material for: Natural variation in stochastic photoreceptor specification and color preference in Drosophila
Source: eLife journal article supplement (doi:10.7554/elife.29593), 2017-12-18
Supplement: supp [file elife-29593-supp-v1.zip › elife_poa_e29593_Figure_1_source_data_1.xlsx]

## Sheet: Sheet1
Figure 1 - Source Data 1. DGRP % SsON phenotypes
DGRP Line	% SsON	SD	Presence of sin*
730	18.776	10.3938	0
303	31.0608	4.31231	0
528	33.2942	6.64545	1
379	33.3418	5.08593	0
177	34.3542	3.28467	1
158	34.3852	4.48316	0
894	35.1944	7.01697	0
397	39.7456	10.2839	1
395	39.8673	6.38219	2
642	40.4496	5.57845	2
109	40.556	2.62109	2
437	41.572	3.33034	2
566	42.259	4.33263	0
105	42.4717	2.34498	2
57	42.5434	5.8153	2
392	43.3911	6.38186	2
374	43.4136	5.3318	2
40	43.5588	3.18964	2
360	43.7793	9.99646	1
332	43.9423	6.17906	1
705	44.0902	1.84494	2
42	44.6148	5.02275	2
765	44.824	9.42716	2
385	45.5078	8.17982	2
161	45.5794	5.70546	2
21	46.0401	4.3646	2
362	46.1696	5.69805	2
399	47.2473	3.55132	2
406	47.7856	1.74963	2
153	47.9516	5.49496	2
820	48.1254	8.31029	2
714	49.0253	4.69966	2
530	49.073	2.78868	2
28	49.4691	5.09221	2
712	49.7807	3.61323	0
721	49.9561	4.88331	2
716	49.9771	8.96319	2
75	50.0772	12.6983	2
233	50.0944	6.00008	2
83	50.3701	4.03088	2
45	50.7088	4.52152	2
91	51.3819	3.40347	2
377	51.4345	5.49232	2
596	52.4766	4.57847	0
819	52.6648	15.9193	0
486	52.8523	2.23188	2
359	52.8731	5.23666	0
535	52.9039	3.40945	2
461	52.9555	5.24992	2
757	53.0384	1.22973	2
335	53.2536	4.14328	1
375	53.5749	9.92225	0
239	53.7596	7.49997	0
897	53.8144	11.7455	0
409	54.1073	2.88594	0
551	54.4953	1.6739	1
315	55.7898	6.6383	2
93	55.8417	9.32254	2
887	56.0978	5.85235	1
310	56.0984	4.60878	0
352	56.2955	5.5908	0
859	56.363	2.3109	0
142	56.6916	3.3591	2
48	57.0362	8.2014	1
861	57.5225	5.27077	1
857	57.6724	1.92397	2
508	57.7125	3.84186	0
235	57.829	6.10817	0
371	57.9555	6.66961	2
855	58.0281	9.93159	0
391	58.0491	2.84082	0
390	58.4359	13.1321	1
129	58.6776	3.09544	2
703	58.9631	7.11352	2
318	59.1618	5.53623	2
805	59.2856	5.03208	0
513	59.3607	2.73339	0
350	59.4439	6.37285	0
59	59.5342	4.01308	0
32	59.9136	4.06171	0
324	60.1206	4.57532	0
559	60.1227	7.90748	0
908	60.3134	2.0357	0
88	60.44	4.89355	0
774	60.7608	6.51949	2
852	61.0618	4.29504	0
849	61.1024	2.64201	0
913	61.176	3.47224	0
405	61.5709	6.3697	0
853	61.6141	4.29701	0
900	61.6828	4.45012	0
383	61.8739	6.45152	0
822	61.8916	4.91337	0
100	62.0159	3.43664	0
627	62.2297	7.57262	0
73	62.5301	6.0569	0
892	62.7342	4.96795	0
208	62.827	6.84856	0
26	62.8341	5.16094	0
304	62.9108	4.09985	0
439	63.0497	2.80021	0
595	63.4378	4.38717	0
890	63.4693	7.02698	0
227	63.6405	3.83035	0
149	63.8354	3.80411	0
136	63.9112	4.34142	0
502	64.0691	7.07864	0
319	64.2365	3.65981	0
491	64.5675	2.44778	0
31	64.5708	8.26051	1
790	64.5932	2.38942	0
799	64.6812	2.79202	0
69	64.8039	6.43297	0
748	64.8763	9.40855	0
237	64.901	5.55098	0
738	64.9313	8.99752	0
348	64.9676	5.9588	0
441	65.3061	5.80931	0
850	65.3123	12.4231	0
808	65.3353	4.46876	0
370	65.4308	3.52955	0
373	65.4872	4.97262	0
321	65.6053	4.00574	1
727	65.7194	4.29817	0
707	65.7708	3.96214	2
38	66.1265	4.47172	0
821	66.1351	4.48549	0
639	66.3655	5.47565	0
907	66.3797	4.54556	0
223	66.522	5.25736	2
313	66.5947	4.63515	0
101	66.7088	1.9854	0
818	66.9432	4.99683	0
812	66.9916	7.37667	0
317	67.1001	10.2365	1
336	67.109	5.68346	0
356	67.1116	3.51577	0
306	67.1404	3.637	0
884	67.3923	5.0561	0
555	67.4445	6.15245	0
380	67.4833	3.65525	0
340	67.8643	2.56867	0
879	67.8811	1.86845	0
365	67.9371	4.34966	0
584	67.963	3.27866	0
217	67.983	3.86256	1
634	68.151	5.2247	0
509	68.1808	3.33971	0
41	68.5254	2.72288	0
189	68.5367	2.20548	0
176	68.5778	4.11305	0
882	68.6574	6.16774	0
301	68.7764	3.40272	0
517	68.9274	2.11151	0
804	69.0868	3.72739	0
357	69.1416	2.69002	0
181	69.1483	2.65625	0
787	69.3219	3.88763	0
505	69.3432	5.27333	0
358	69.4722	4.76626	0
911	69.4925	4.5399	0
138	69.5472	3.34206	0
320	69.5911	2.56836	0
426	69.763	5.04613	0
796	69.7664	9.94537	0
228	69.8243	3.2864	1
776	70.1254	6.83832	0
440	70.2322	2.74691	0
810	70.2865	5.65196	0
732	70.3916	7.17773	0
381	70.4735	3.83626	0
737	70.7105	4.69107	0
783	70.7541	2.79766	0
427	70.8071	7.30453	0
761	70.8977	4.10319	0
280	71.1067	2.22892	0
307	71.1692	2.4763	0
802	71.1847	4.58169	0
361	71.4012	7.46827	0
646	71.4116	4.37746	0
309	71.4806	5.33473	0
837	71.6906	4.25458	0
355	71.7179	5.40548	0
589	71.7754	6.31629	0
85	72.0547	4.08487	0
256	72.1077	4.05429	0
531	72.6599	6.42184	0
367	72.7768	3.9527	0
843	72.9907	1.97097	0
563	73.1825	5.04864	0
287	73.2007	3.23453	0
832	73.3474	5.67101	0
382	73.9127	4.14108	0
386	73.9843	6.15622	0
630	74.1513	7.32002	0
492	74.3737	4.48855	0
786	74.5292	5.20417	0
801	74.6789	3.46394	0
354	74.7239	4.41717	0
195	75.1517	5.29195	0
338	75.6871	3.2474	0
443	77.6519	2.63405	0
229	83.1437	5.43862	0
* For presence of sin, 0 = hemizygous no sin; 1 = hemizygous sin or no sin; 2 = hemizygous sin
