# Supplementary material for: Natural variation in stochastic photoreceptor specification and color preference in Drosophila
Source: eLife journal article supplement (doi:10.7554/elife.29593), 2017-12-18
Supplement: supp [file elife-29593-supp-v1.zip › elife_poa_e29593_Figure_2_source_data_1.xlsx]

## Sheet: Sheet1
Figure 2 - Source Data 1. DGRP behavior phenotypes
DGRP Line	PI	SEM	N	Presence of sin*
392	-0.470512	0.0670603	6	2
142	-0.379666	0.0532731	7	2
91	-0.340991	0.0379625	6	2
774	-0.334482	0.0463038	5	2
492	-0.26157	0.0454027	6	0
340	-0.250462	0.0594839	9	0
530	-0.244567	0.124866	7	2
837	-0.228194	0.0621045	12	0
38	-0.212283	0.0446136	7	0
83	-0.205782	0.0489999	6	2
28	-0.198789	0.0436934	7	2
309	-0.177464	0.0855277	10	0
776	-0.173848	0.0388768	5	0
101	-0.166273	0.0941056	6	0
437	-0.159306	0.0468949	6	2
93	-0.138989	0.0818902	5	2
535	-0.115127	0.0480282	10	2
352	-0.0909133	0.0540239	7	0
385	-0.0871936	0.0506745	5	2
405	-0.0467746	0.0338192	9	0
738	-0.0452016	0.0728576	8	0
318	-0.0386816	0.0674969	7	2
808	-0.0383201	0.110919	5	0
395	-0.0381645	0.0982069	5	2
721	-0.0350571	0.050463	5	2
380	-0.0328178	0.0659847	6	0
783	-0.0235306	0.0658245	5	0
208	-0.0228114	0.0757342	6	0
897	-0.0181245	0.0757883	5	0
356	-0.0103796	0.0363743	6	0
805	-0.00413432	0.055732	5	0
307	0.00141198	0.045492	10	0
377	0.0197762	0.052065	5	2
882	0.0202543	0.0374327	12	0
810	0.0500258	0.0721957	7	0
75	0.0540706	0.0711377	5	2
105	0.0562447	0.0759948	9	2
703	0.0756209	0.0922794	7	2
907	0.0774184	0.0661349	8	0
486	0.0899005	0.0672668	5	2
362	0.0899894	0.0416584	5	2
280	0.119231	0.0625993	6	0
509	0.129117	0.0312684	5	0
320	0.142344	0.0407529	5	0
301	0.150319	0.0522916	5	0
40	0.153793	0.0371137	5	2
589	0.174975	0.0127653	6	0
584	0.189841	0.0601541	6	0
399	0.191581	0.0876409	5	2
427	0.207253	0.0325867	6	0
181	0.271764	0.0894408	5	0
21	0.280742	0.043521	5	2
382	0.327696	0.0429395	7	0
41	0.449042	0.0356249	5	0
* For presence of sin, 0 = homozygous no sin; 2 = homozygous sin
