# Supplementary figures and images for: Natural variation in stochastic photoreceptor specification and color preference in Drosophila
Source: eLife journal article supplement (doi:10.7554/elife.29593), 2017-12-18

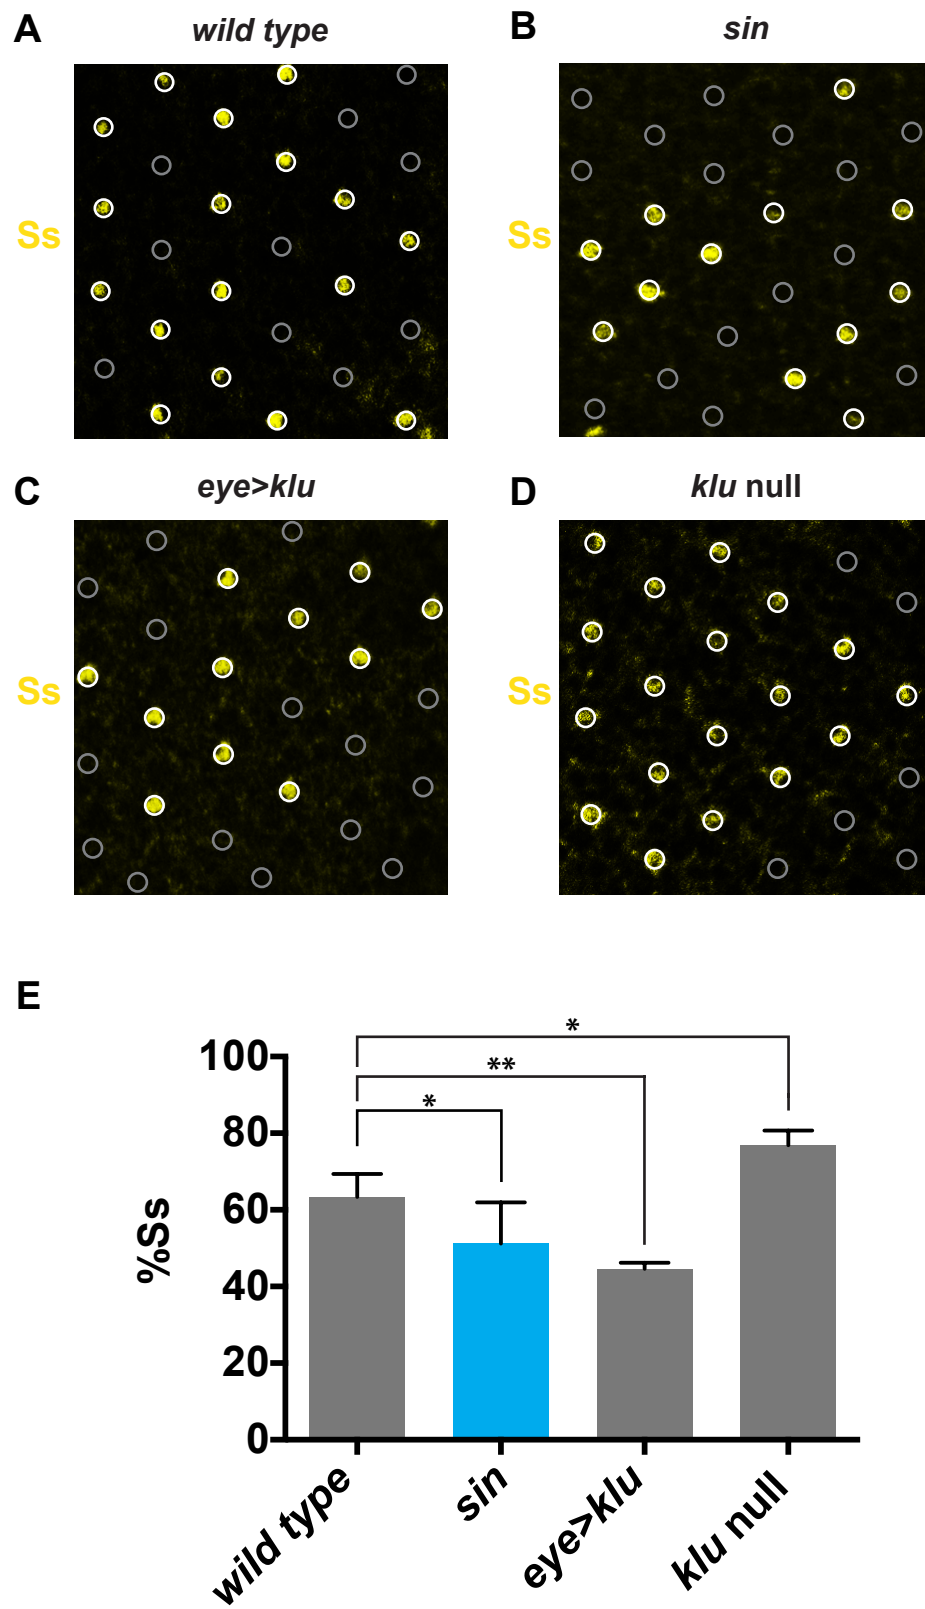

Figure 1 - Figure Supplement 2

Supplement: supp [file elife-29593-supp-v1.zip]

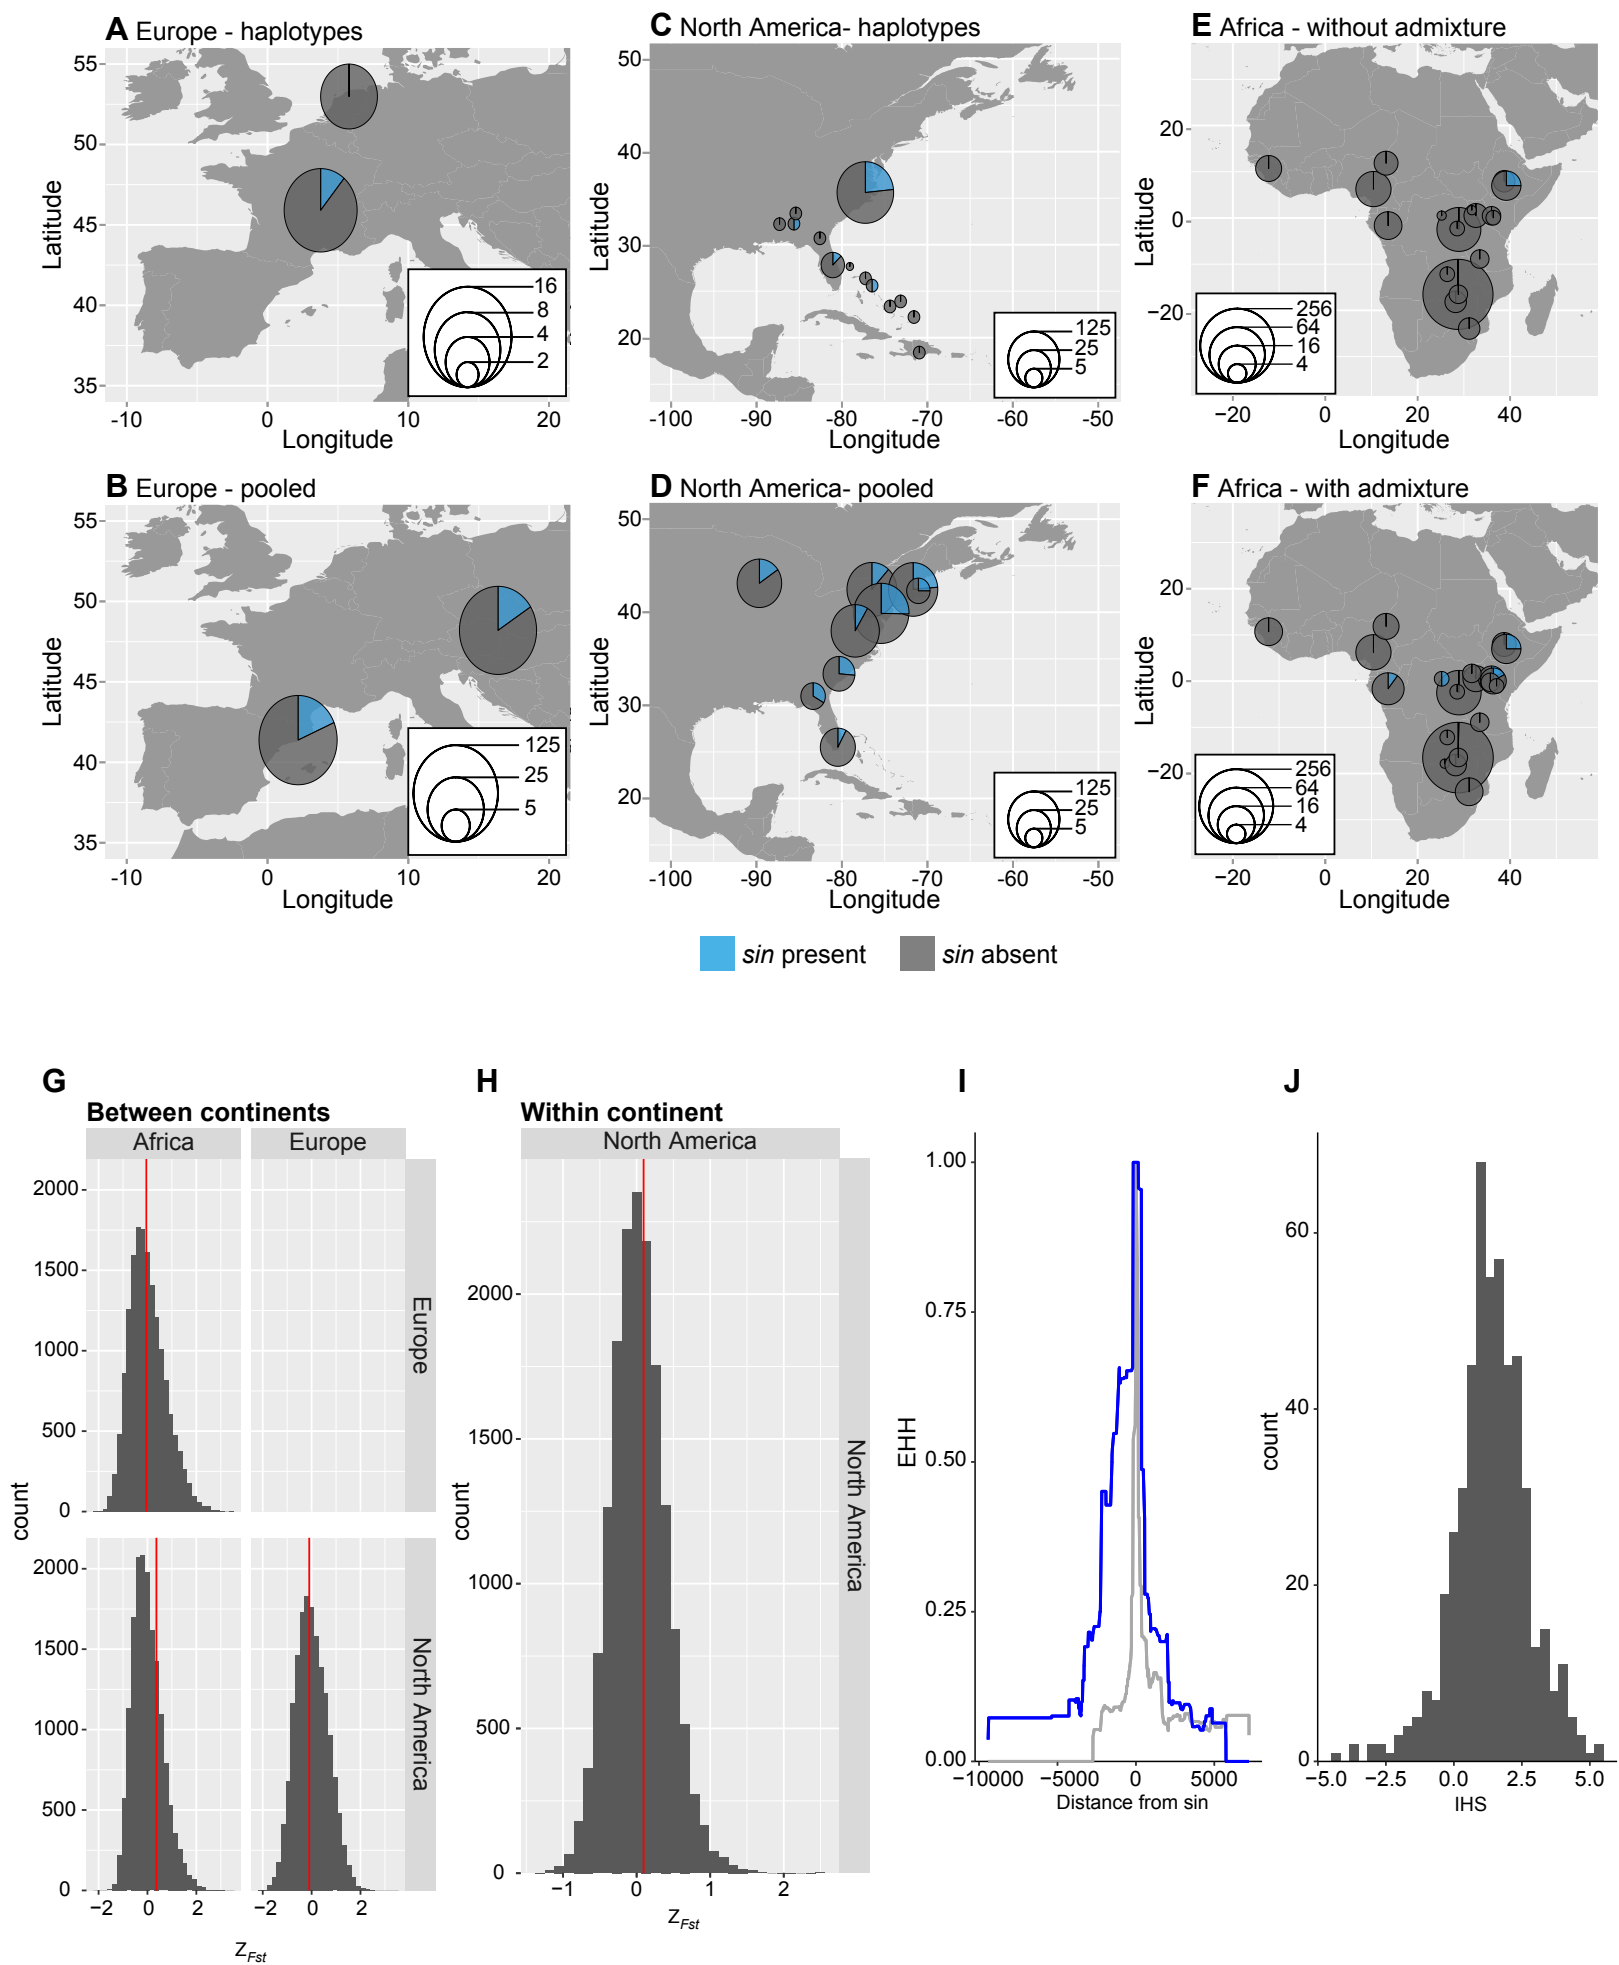

**Figure 1 - Figure Supplement 3**

Supplement: supp [file elife-29593-supp-v1.zip]

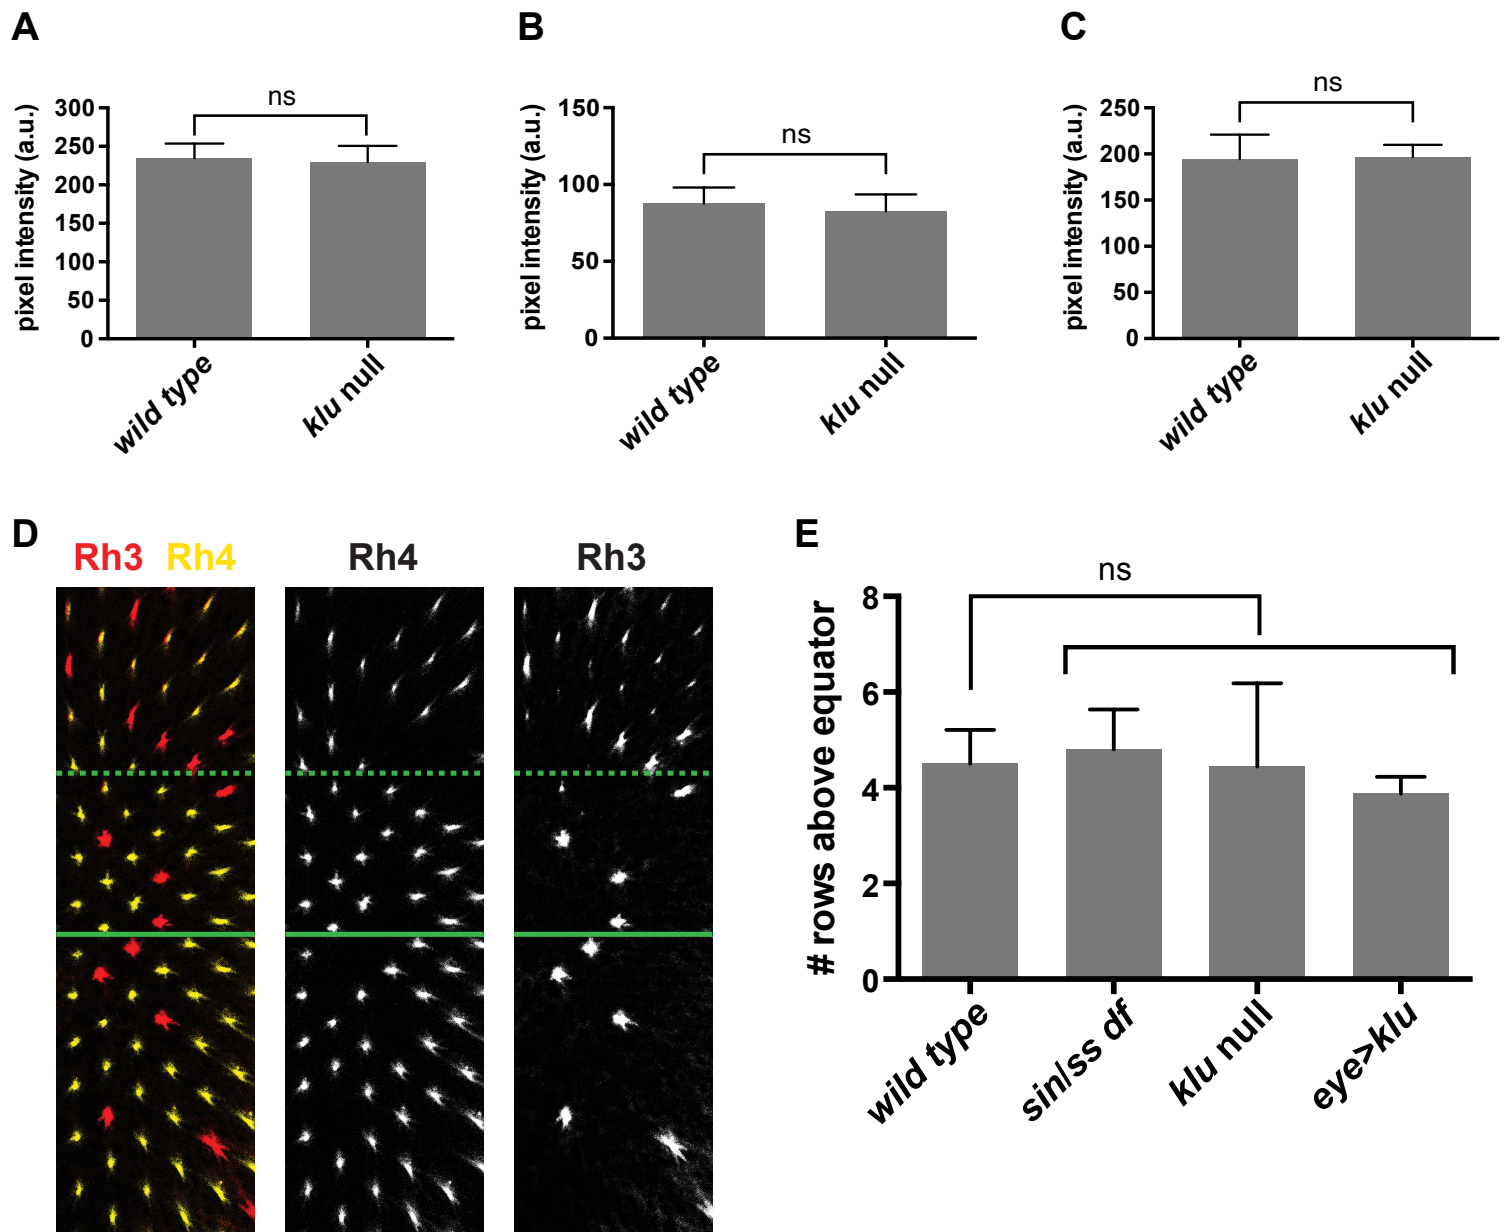

Figure 1 - Figure Supplement 4

Supplement: supp [file elife-29593-supp-v1.zip]

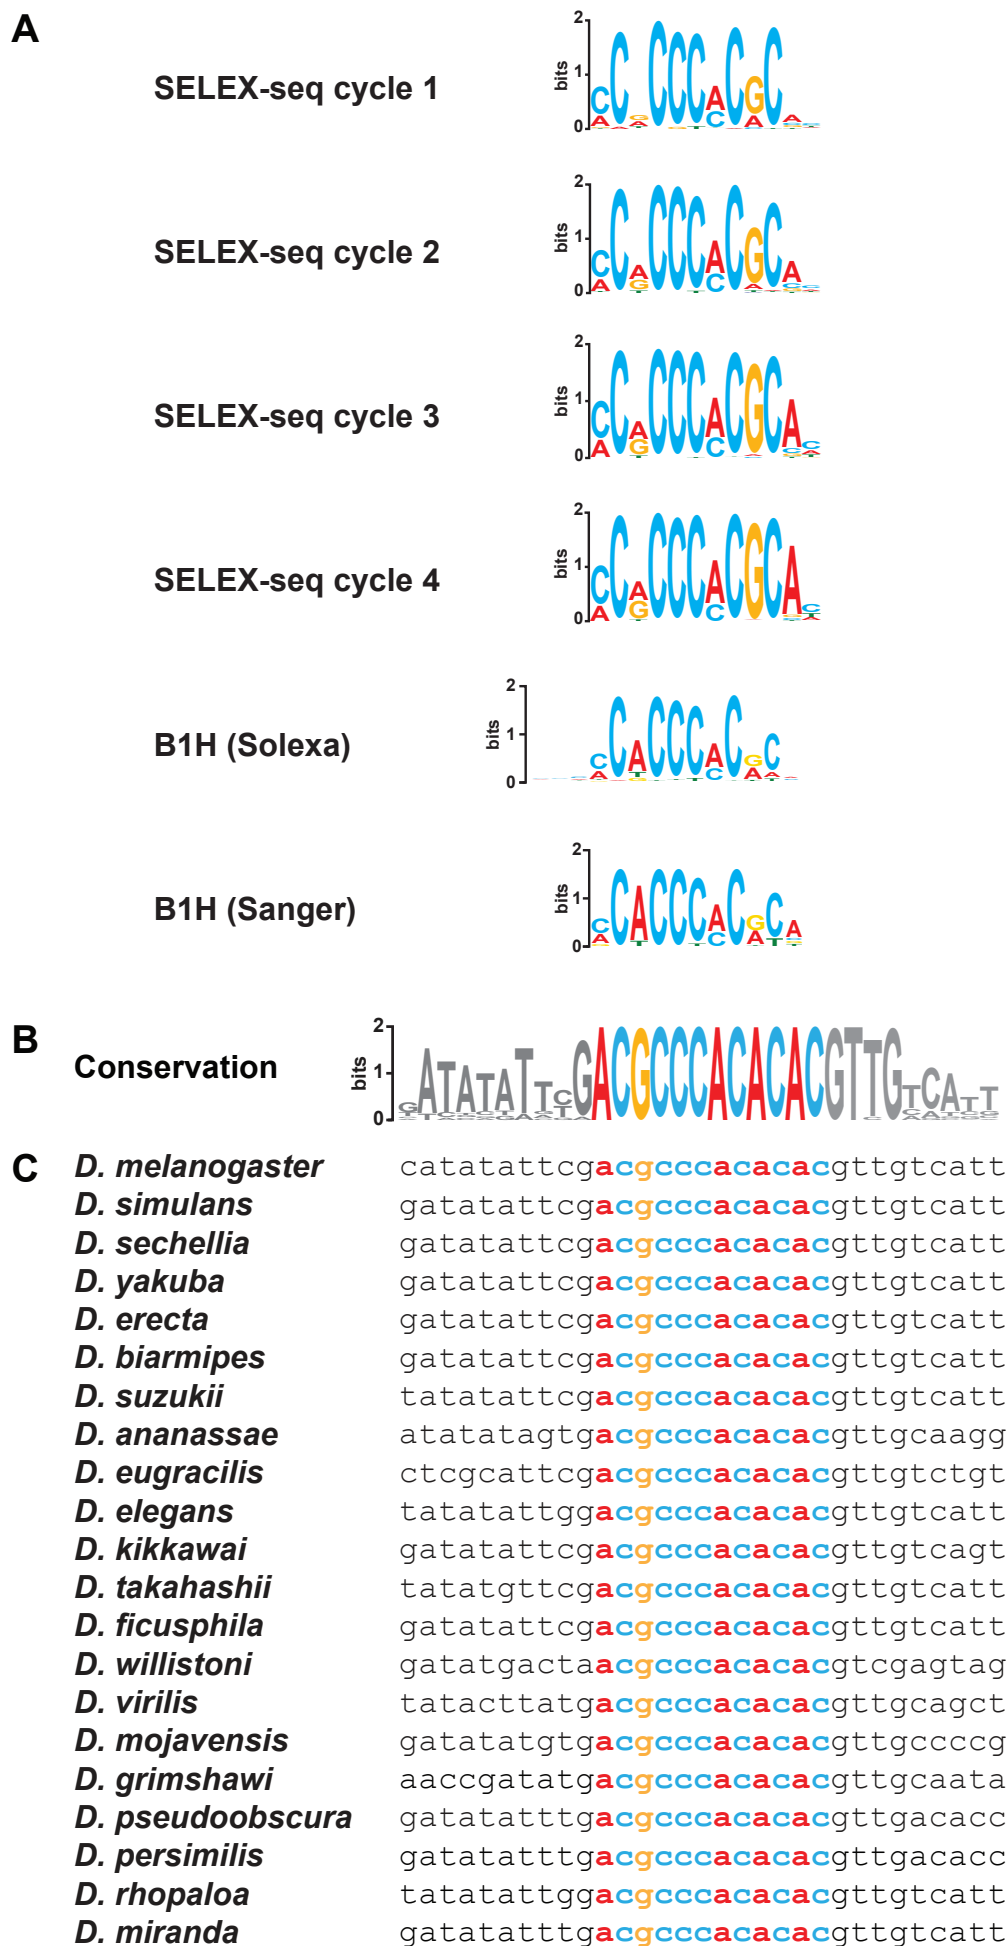

Figure 3 - Figure Supplement 1

Supplement: supp [file elife-29593-supp-v1.zip › elife_poa_e29593_Figure_3_figure_supplement_1.pdf]

**A****single retina**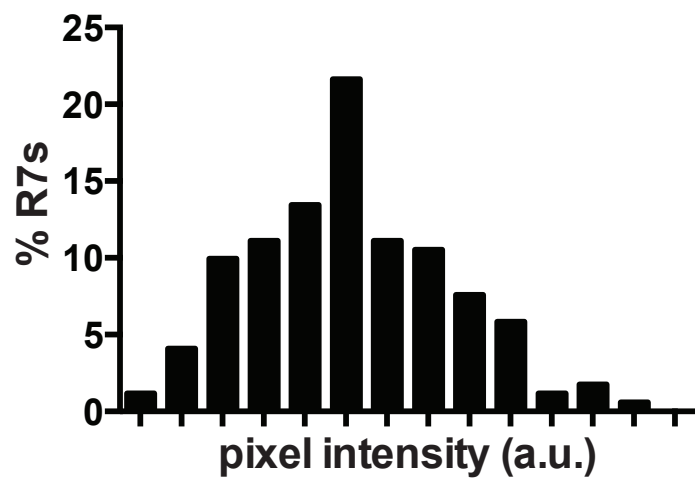**B****all retinas**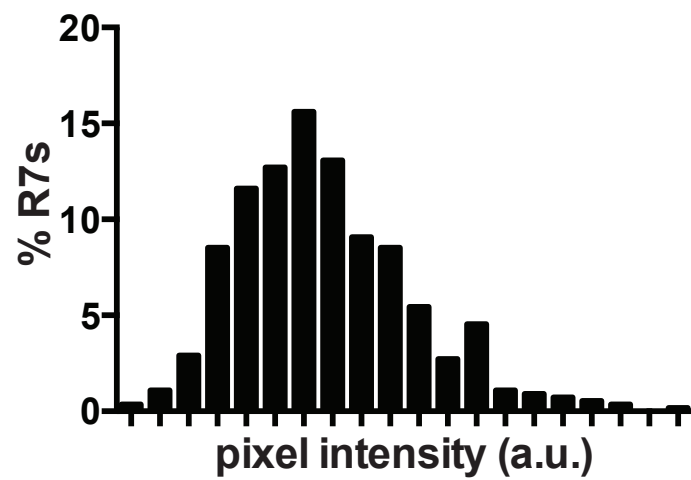**Figure 4 - Figure Supplement 1**

Supplement: supp [file elife-29593-supp-v1.zip › elife_poa_e29593_Figure_4_figure_supplement_1.pdf]

**A**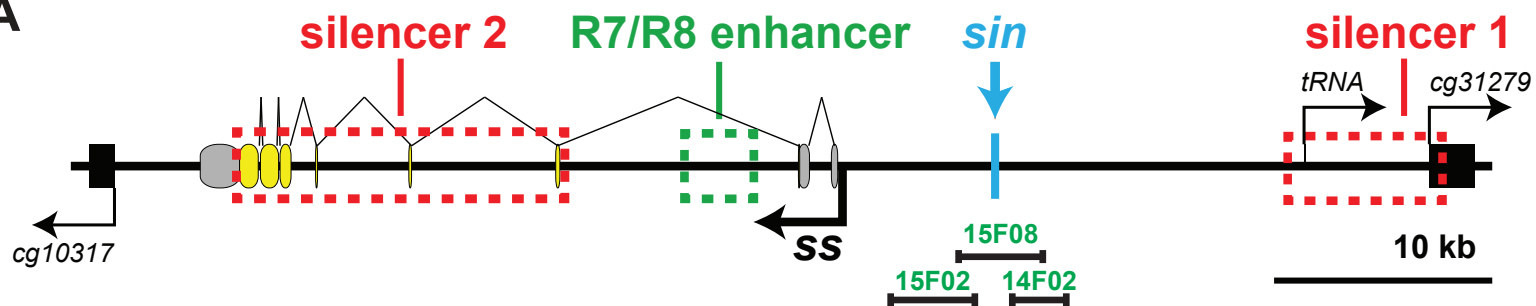**B****14F02**

**ELAV**  
**YFP**

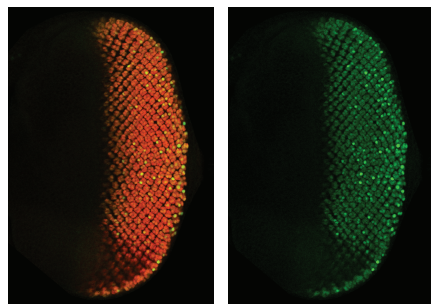**C****15F08**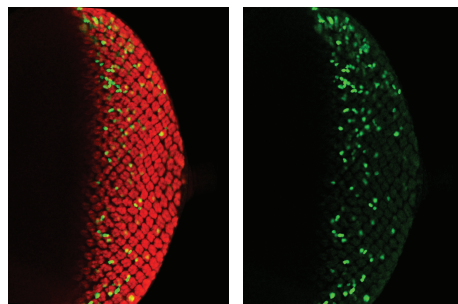**D****15F02**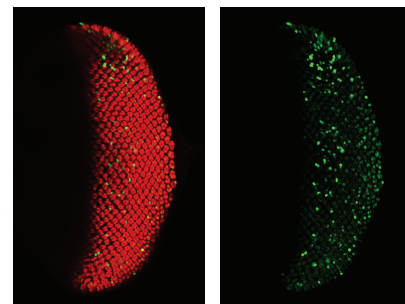

**Figure 1 -Figure Supplement 1**

Supplement: supp [file elife-29593-supp-v1.zip › elife_poa_e29593_Figure_1_figure_supplement_1.pdf]
